# Supplementary material for: Novel theranostic agent for PET imaging and targeted radiopharmaceutical therapy of tumour-infiltrating immune cells in glioma
Source: PubMed Central journal article supplement — eBioMedicine. 2021 Sep 13;71:103571. doi: 10.1016/j.ebiom.2021.103571 (PMC8446777; doi:10.1016/j.ebiom.2021.103571), 2021-09-13
Supplement: mmc1.pdf [file mmc1.pdf]

## Supplementary Figures

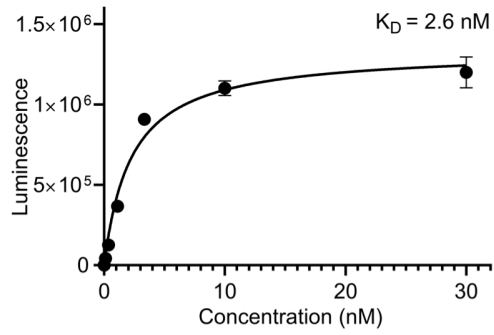

**Supplementary Figure 1. Binding affinity of Lumi-804- $\alpha$ CD11b.** Binding curve, specific binding of Eu (III)-Lumi804- $\alpha$ CD11b to J774 macrophage ( $K_d = 2.6 \text{ nM}$ ).

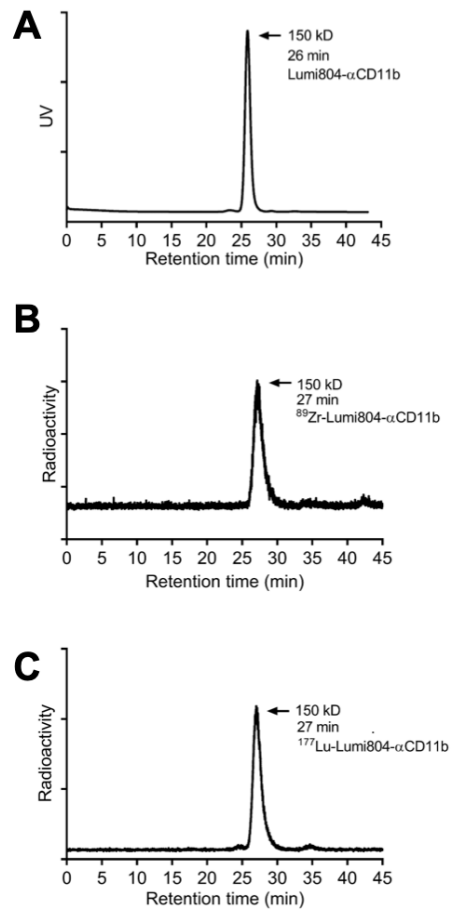

**Supplementary Figure 2. Representative SEC- HPLC chromatograms of  $\alpha$ CD11b and its radioactive conjugates. (A) Representative SEC-HPLC chromatogram of Lumi804- $\alpha$ CD11b in aqueous buffer after 20 days with a (26 min retention time, UV detector, 280 nm). (B-C) Representative radio-SEC-HPLC chromatogram of  $^{89}\text{Zr}$ -Lumi804- $\alpha$ CD11b and  $^{177}\text{Lu}$ -Lumi804- $\alpha$ CD11b with 27 min retention time (gamma detector).**

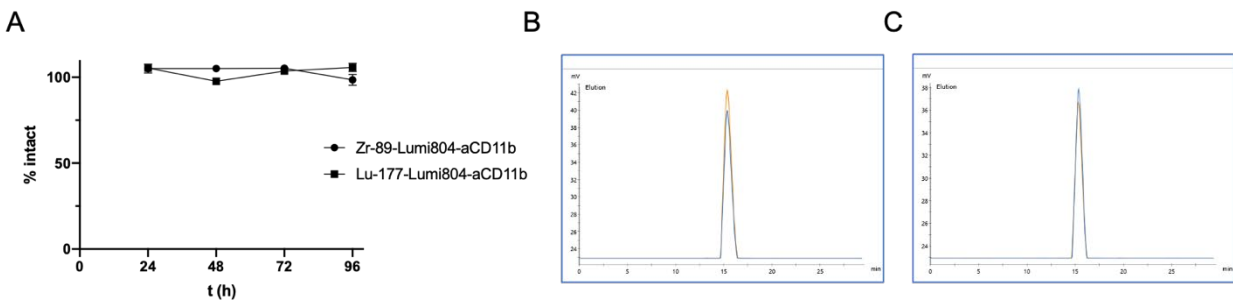

**Supplementary Figure 3.** (A) Serum stability of  $^{89}\text{Zr}$ -Lumi804- $\alpha\text{CD11b}$  and  $^{177}\text{Lu}$ -Lumi804- $\alpha\text{CD11b}$  represented as per cent of control at time zero (n=2). Radio-SEC-HPLC (duplicates overlaid) of  $^{89}\text{Zr}$ -Lumi804- $\alpha\text{CD11b}$  (B) and  $^{177}\text{Lu}$ -Lumi804- $\alpha\text{CD11b}$  (C) at 96 hours (retention time 15.3 min).

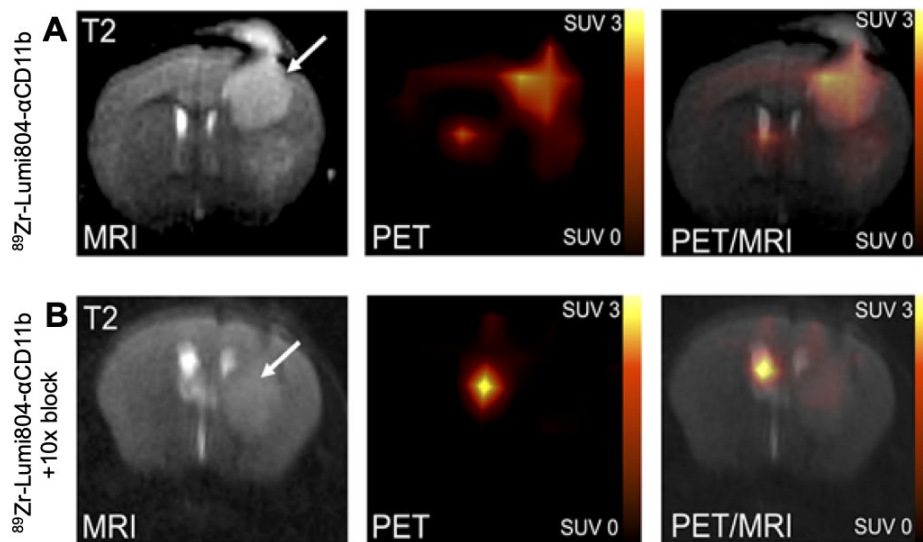

a

**Supplementary Figure 4. PET imaging of  $^{89}\text{Zr}$ -Lumi804- $\alpha\text{CD11b}$  in GL261 syngeneic glioma mice. (A)** Representative axial contrast enhanced T2 MRI, PET and PET/MRI images of the brain of glioma-bearing mice 72 h post-injection of  $^{89}\text{Zr}$ -Lumi804- $\alpha\text{CD11b}$ . White arrow indicates tumor. **(B)** Representative axial contrast enhanced T2 MRI, PET and PET/MRI images of the brain of glioma-bearing mice 72 h post-injection of  $^{89}\text{Zr}$ -Lumi804- $\alpha\text{CD11b}$  with 10x blocking dose.

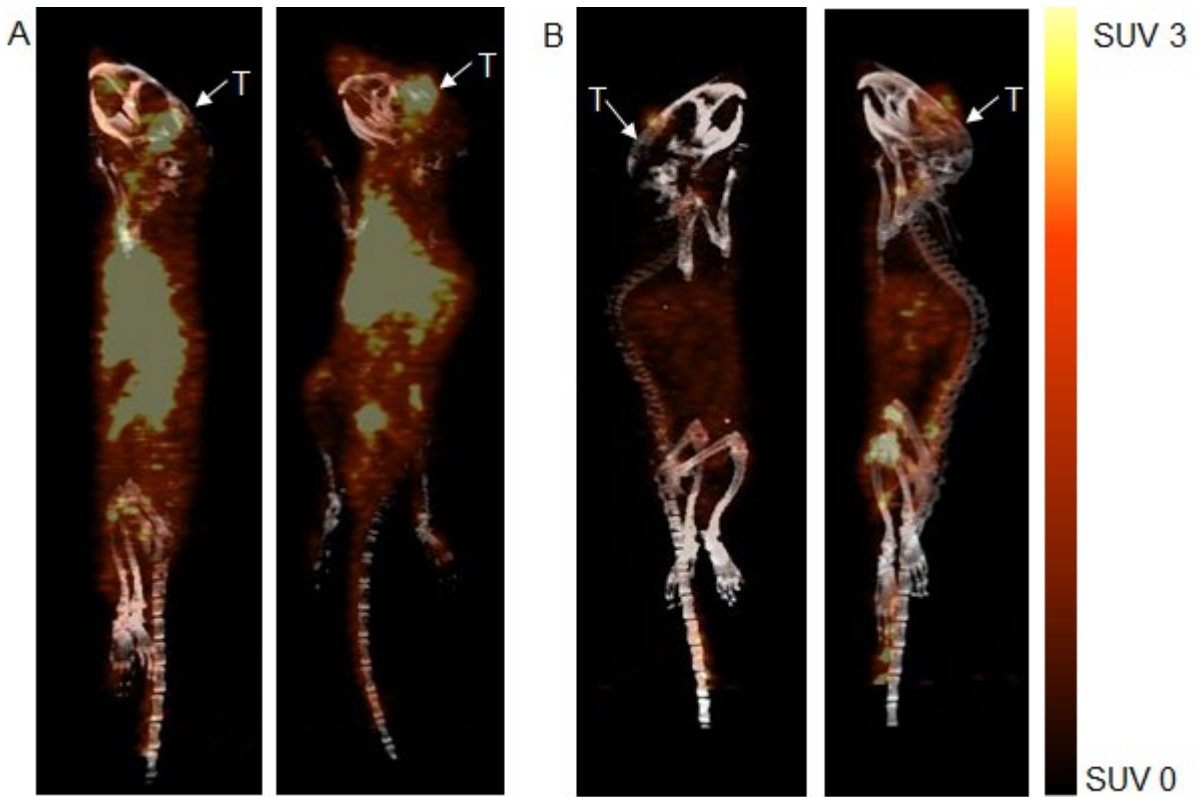

**Supplementary Figure 5.** PET/CT images of  $^{89}\text{Zr}$ -Lumi804- $\alpha\text{CD11b}$  in GL261 syngeneic glioma mice (72 h post injection). (A) Mice received  $^{89}\text{Zr}$ -Lumi804- $\alpha\text{CD11b}$  (3.7 MBq, 11.1 GBq/ $\mu\text{mol}$ ) and (B) 10-fold lower specific activity (1.1 GBq/ $\mu\text{mol}$ ).

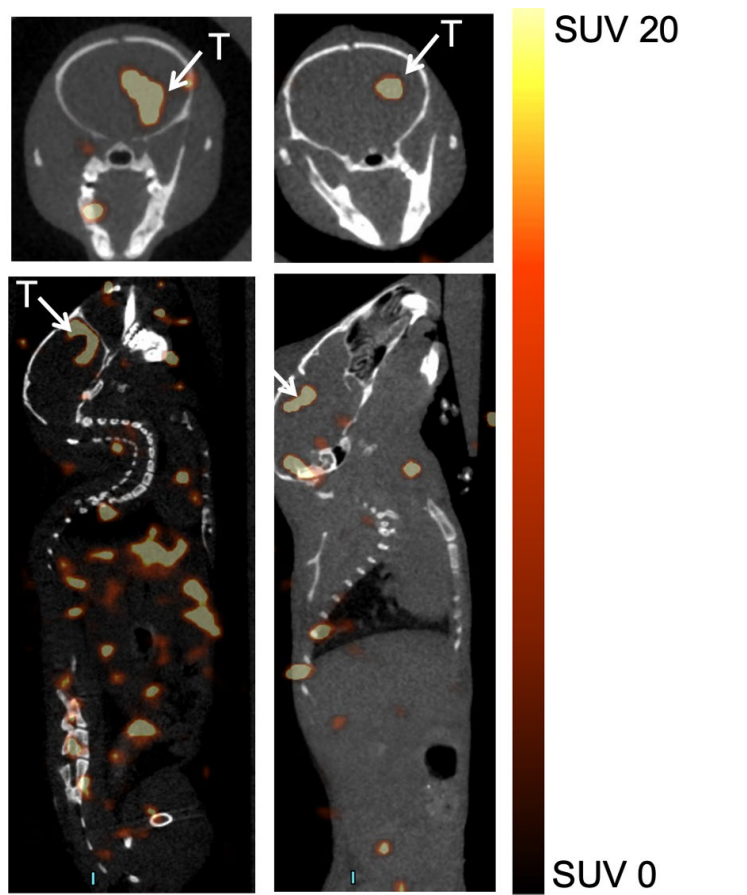

Supplementary Figure 6. SPECT-CT images of  $^{177}\text{Lu}$ -Lumi804- $\alpha\text{CD11b}$  in GL261 syngeneic glioma mice with transaxial view of the skull (72 h post injection, 7.4 MBq, 11.1 GBq/ $\mu\text{mol}$ ).

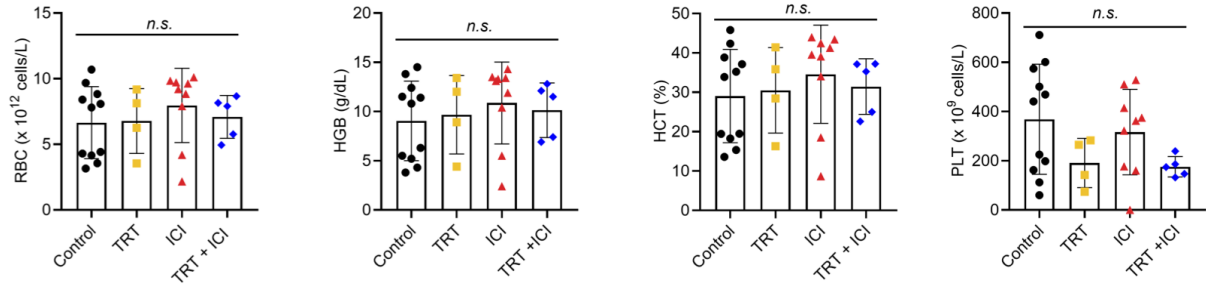

**Supplementary Figure 7. Complete blood count (CBC) panel post-treatment.** CBC analysis performed on superficial temporal vein blood showed no leukodepletion from TRT. One-way ANOVA with Tukey's multiple comparisons test was used to assess significance. Data are represented as the mean  $\pm$  SD.
