# Supplementary material for: Novel theranostic agent for PET imaging and targeted radiopharmaceutical therapy of tumour-infiltrating immune cells in glioma
Source: PubMed Central journal article supplement — eBioMedicine. 2021 Sep 13;71:103571. doi: 10.1016/j.ebiom.2021.103571 (PMC8446777; doi:10.1016/j.ebiom.2021.103571), 2021-09-13
Supplement: mmc2.pdf [file mmc2.pdf]

**Subject:** Re: Acknowledgement consent  
**Date:** Wednesday, August 11, 2021 at 10:59:28 AM Central Daylight Time  
**From:** Wu, Yijen  
**To:** Edwards, Wilson Barry, Day, Kathryn Elizabeth, Raphael, Itay  
**CC:** Gary Kohanbash

Of course, Barry. Congratulations for your MS.

Yijen

---

**From:** Edwards, Wilson Barry <wbe2@pitt.edu>  
**Sent:** Wednesday, August 11, 2021 11:43 AM  
**To:** Wu, Yijen; Day, Kathryn Elizabeth; Raphael, Itay  
**Cc:** Gary Kohanbash  
**Subject:** Acknowledgement consent

Hey Yijen and Kate,  
We have finally gotten tentative acceptance on our eBiomedicine manuscript EBIOM-D-21-00498R1 “Novel theranostic agent for PET imaging and targeted radiopharmaceutical therapy of tumor-infiltrating immune cells in glioma”.

You are both acknowledged in the manuscript. If you consent to acknowledgement, please reply positively in to this email by Friday 13, 2021.

Thanks,

Barry
