# Supplementary material for: Novel theranostic agent for PET imaging and targeted radiopharmaceutical therapy of tumour-infiltrating immune cells in glioma
Source: PubMed Central journal article supplement — eBioMedicine. 2021 Sep 13;71:103571. doi: 10.1016/j.ebiom.2021.103571 (PMC8446777; doi:10.1016/j.ebiom.2021.103571), 2021-09-13
Supplement: mmc3.pdf [file mmc3.pdf]

**Subject:** Re: FW: Acknowledgement consent  
**Date:** Friday, August 13, 2021 at 8:25:22 AM Central Daylight Time  
**From:** Edwards, Wilson Barry  
**To:** Kate Day

---

**From:** Kate Day <kathryneday@gmail.com>  
**Date:** Friday, August 13, 2021 at 7:38 AM  
**To:** Edwards, Wilson Barry <wbe2@pitt.edu>  
**Subject:** Re: FW: Acknowledgement consent

Sure! And acknowledgement would be great.

Thanks,  
Kate

On Fri, Aug 13, 2021, 8:36 AM Edwards, Wilson Barry <[wbe2@pitt.edu](mailto:wbe2@pitt.edu)> wrote:

Hey Kate, please respond to email by noon today if you wish to be acknowledged in the manuscript, otherwise we will have to remove your name, which we hate to do!

Barry

---

**From:** Edwards, Wilson Barry <[wbe2@pitt.edu](mailto:wbe2@pitt.edu)>  
**Date:** Wednesday, August 11, 2021 at 10:43 AM  
**To:** Wu, Yijen <[yijenwu@pitt.edu](mailto:yijenwu@pitt.edu)>, Day, Kathryn Elizabeth <[ked63@pitt.edu](mailto:ked63@pitt.edu)>, Raphael, Itay <[I.Raphael@pitt.edu](mailto:I.Raphael@pitt.edu)>  
**Cc:** Gary Kohanbash <[gkohanbash@gmail.com](mailto:gkohanbash@gmail.com)>  
**Subject:** Acknowledgement consent

Hey Yijen and Kate,

We have finally gotten tentative acceptance on our eBiomedicine manuscript EBIOM-D-21-00498R1 “Novel theranostic agent for PET imaging and targeted radiopharmaceutical therapy of tumor-infiltrating immune cells in glioma”.

You are both acknowledged in the manuscript. If you consent to acknowledgement, please reply positively in to this email by Friday 13, 2021.

Thanks,

Barry
